# Supplementary material for: Incorporation of two electron acceptors to improve the electron mobility and stability of perovskite solar cells
Source: Royal Society of Chemistry journal article supplement (doi:10.1039/c9tc02457c), 2019-01-01
Supplement: c9tc02457c1.pdf [file c9tc02457c1.pdf]

## Supporting Information

### Incorporation of Two Electron Acceptors to Improve Electron Mobility and Stability of Perovskite Solar Cells

Xianglan Tang <sup>a,b</sup>, Shuqin Xiao <sup>b,c</sup>, Qingxia Fu <sup>a,b</sup>, Yiwang Chen <sup>a,b</sup>, Ting Hu <sup>\*b,c</sup>

<sup>a</sup>College of Chemistry, Nanchang University, 999 Xuefu Avenue, Nanchang 330031,  
China

<sup>b</sup>Institute of Polymers and Energy Chemistry, Nanchang University, 999 Xuefu  
Avenue, Nanchang 330031, China

<sup>c</sup>School of Materials Science and Engineering, Nanchang University, 999 Xuefu  
Avenue, Nanchang 330031, China

Corresponding author. Tel.: +86 791 83968703; fax: +86 7918369561. E-mail:  
huting@ncu.edu.cn (T. Hu)

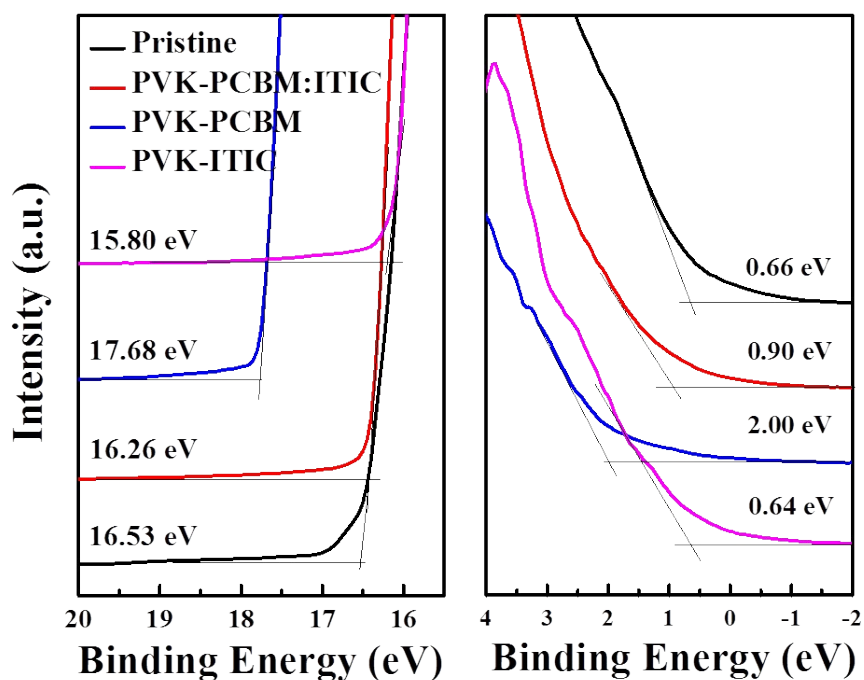

**Figure S1.** Ultraviolet photoelectron spectroscopy (UPS) of secondary electron cutoff and valence band of the pristine (black), PCBM:ITIC treated (red), PCBM treated (blue) and ITIC treated (purple) perovskite films.

**Table S1.** The energy level of pristine, PCBM:ITIC, PCBM and ITIC treated perovskite films.

| Devices       | $E_{\text{cutoff}}$ (eV) | $E_{\text{onset}}$ (eV) | HOMO (eV) | LUMO (eV) |
|---------------|--------------------------|-------------------------|-----------|-----------|
| Pristine      | 16.53                    | 0.66                    | -5.35     | -3.81     |
| PVK-PCBM:ITIC | 16.26                    | 0.90                    | -5.86     | -4.26     |
| PVK-PCBM      | 17.68                    | 2.00                    | -5.54     | -3.96     |
| PVK-ITIC      | 15.80                    | 0.64                    | -6.06     | -4.47     |

**Table S2.** Photovoltaic parameters of the devices based on the pristine and treated films fabricated via solution mixture strategy.

| Devices               | $J_{SC}$<br>(mA cm <sup>-2</sup> ) | $V_{OC}$<br>(V) | FF<br>(%) | PCE<br>(%) | Average<br>PCE<br>(%) |
|-----------------------|------------------------------------|-----------------|-----------|------------|-----------------------|
| Pristine              | 19.11                              | 1.01            | 72.23     | 14.00      | 13.56±0.44            |
| PVK-PCBM:ITIC=1:0     | 19.81                              | 1.02            | 76.16     | 15.51      | 15.12±0.39            |
| PVK-PCBM:ITIC=0.6:0.4 | 20.67                              | 1.05            | 78.98     | 16.99      | 16.65±0.34            |
| PVK-PCBM:ITIC=0.5:0.5 | 20.14                              | 1.04            | 77.45     | 16.36      | 15.90±0.46            |
| PVK-PCBM:ITIC=0.4:0.6 | 20.25                              | 1.04            | 76.13     | 16.09      | 15.45±0.64            |
| PVK-PCBM:ITIC=0:1     | 20.59                              | 1.03            | 74.24     | 15.91      | 15.40±0.51            |

The average and standard deviation values were calculated from 50 cells.

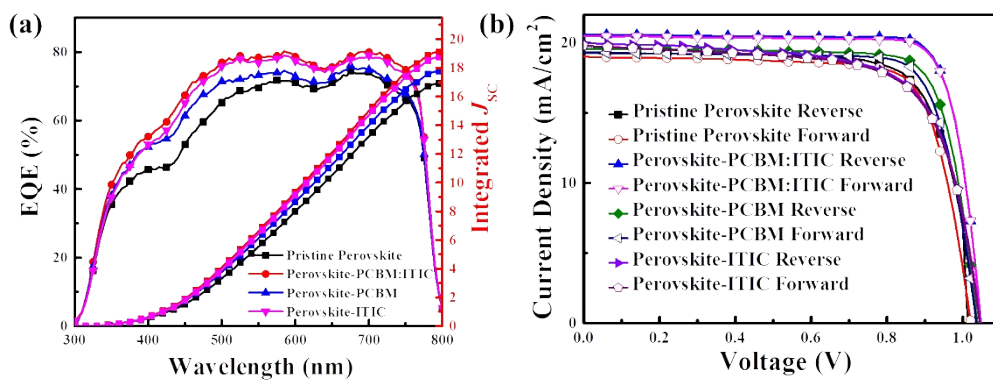

**Figure S2** (a) EQE of the devices based on the pristine and treated perovskite films. (b)  $J$ - $V$  curves for devices measured by forward and reverse scans.

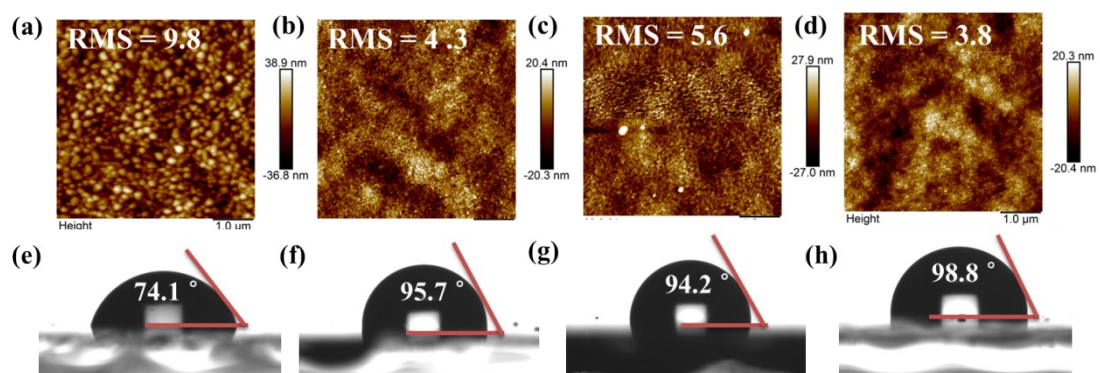

**Figure S3.** Atomic force microscopy (AFM) images for surface topography and the contact angles of water on the pristine (a, e), PCBM:ITIC (b, f), PCBM (c, g) and ITIC (d, h) treated perovskite films.

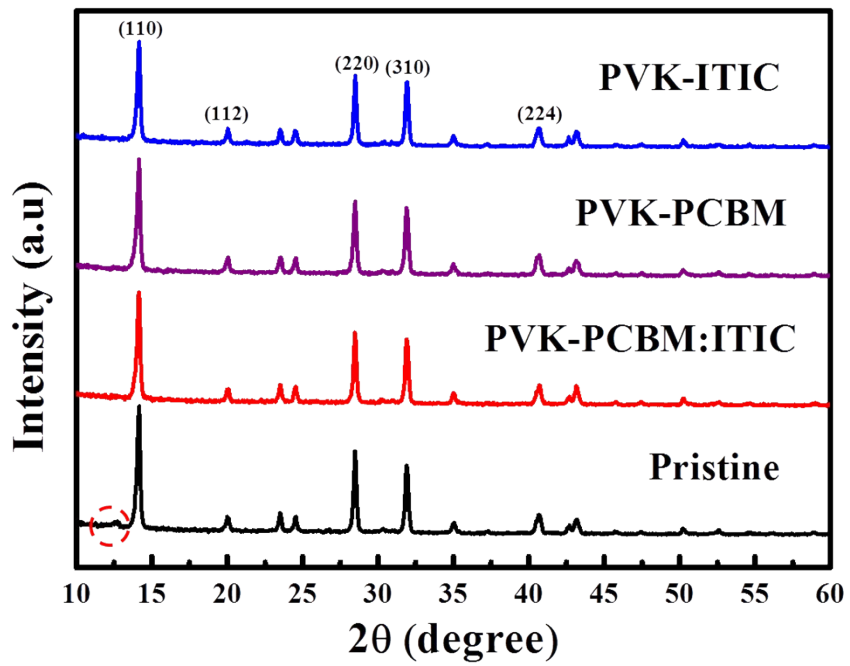

**Figure S4.** GIXRD profile of pristine and treated perovskite films.

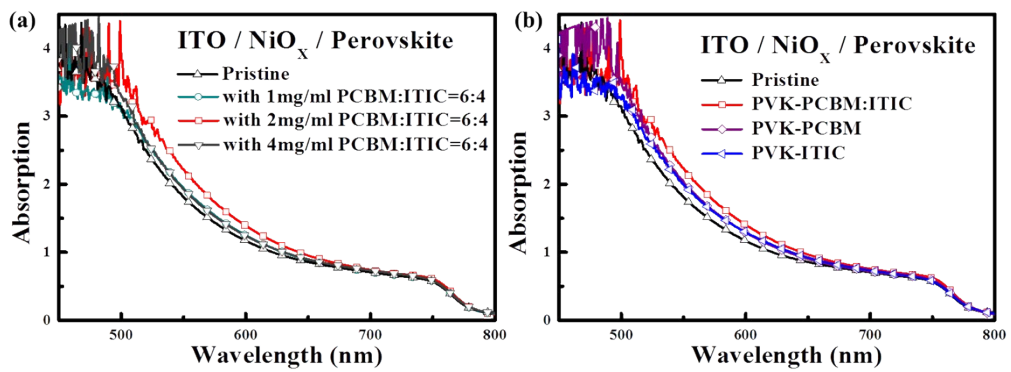

**Figure S5.** UV-Vis absorption spectra of the pristine and treated perovskite films.

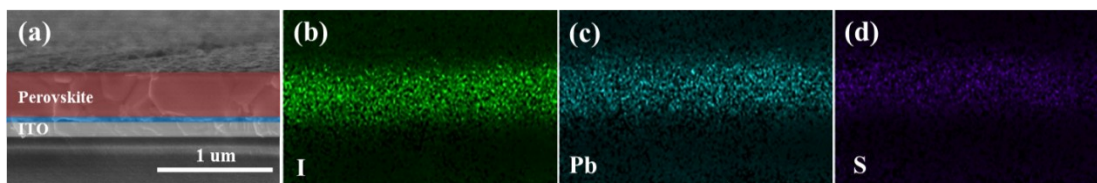

**Figure S6** (a) Cross-sectional SEM image of the inverted device structure (glass/ITO/NiO<sub>x</sub>/Perovskite (treated with PCBM:ITIC)) and EDS mapping of: (b) I, (c) Pb, (d) S elements.



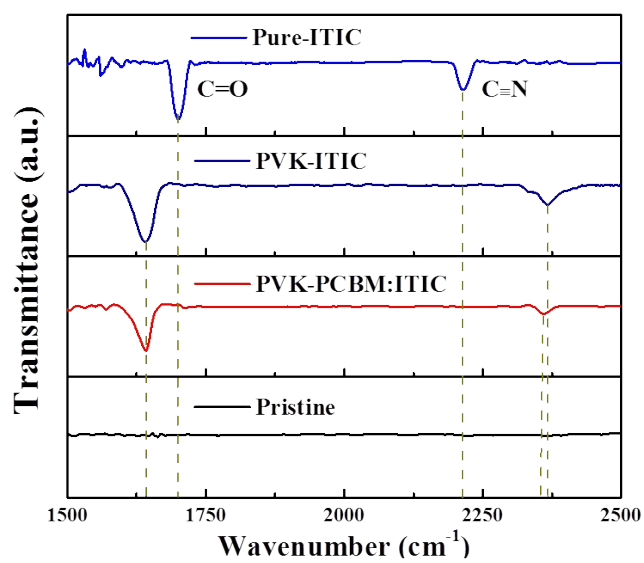

**Figure S7** FTIR spectra of the powder of ITIC, PVK-ITIC, PVK-PCBM:ITIC and pristine perovskite blend.

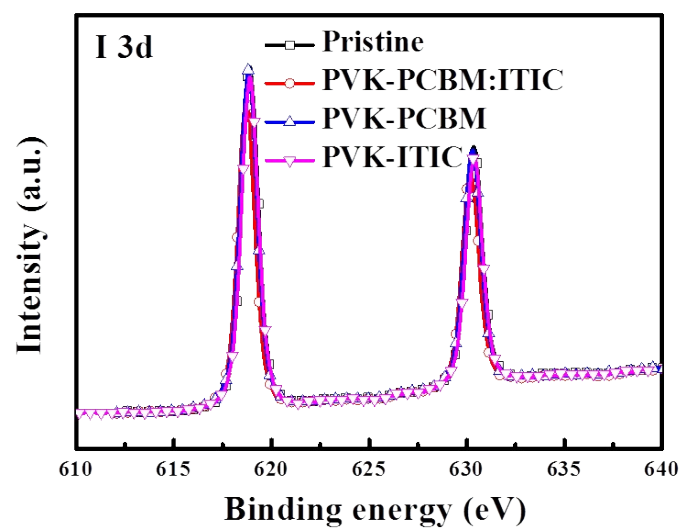

**Figure S8.** XPS spectra in I 3d region for perovskite films made from fresh precursor solutions without and with treatment.

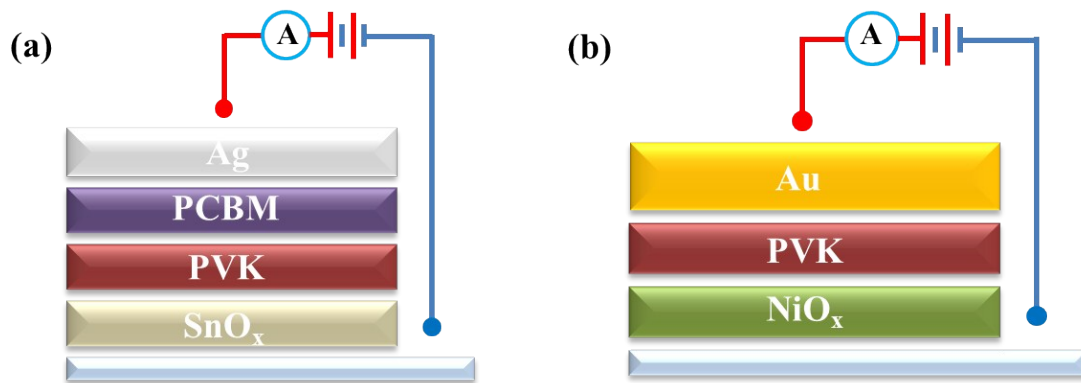

**Figure S9.** The electron-only (a) and hole-only (b) device structures.

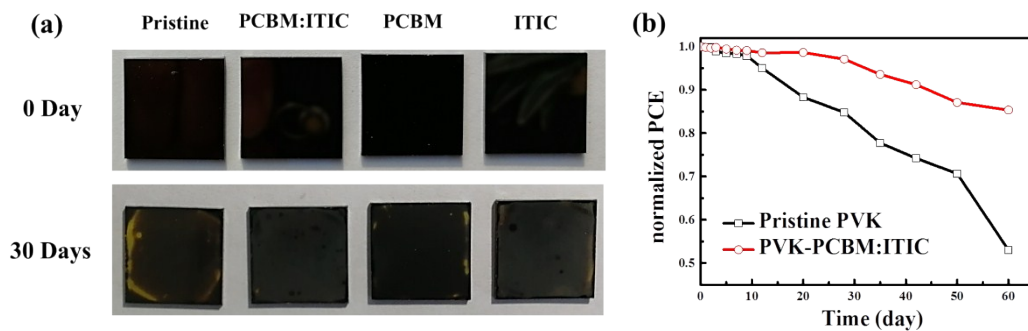

**Figure S10.** (a) A series of photographs of perovskite films without and with treated before and after 30 days in the ambient condition of 60% relative humidity. (b) The corresponding efficiency as a function of the device aging time.
